# Supplementary material for: Cumulative risk of false positive test in relation to breast symptoms in mammography screening: a historical prospective cohort study
Source: Springer Nature journal article supplement (doi:10.1007/s10549-016-3931-8), 2016-08-05
Supplement: MOESM1 [file 10561120]

**Title: Cumulative risk of false positive test in relation to breast symptoms in mammography screening: a historical prospective cohort study**

Deependra Singh<sup>1,2</sup>, Janne Pitkaniemi<sup>1</sup>, Nea Malila<sup>1,2</sup>, Ahti Anttila<sup>1</sup>

<sup>1</sup>Finnish Cancer Registry, Helsinki, Finland

<sup>2</sup>School of Health Sciences, University of Tampere, Tampere, Finland

**Correspondence to: Mr. Deependra Singh**, School of Health Sciences, Medisiinarinkatu 3, FI-33014, University of Tampere, Tampere, Finland.

Tel. no.: +358-449887191; (E-mail: [deependra.singh@cancer.fi](mailto:deependra.singh@cancer.fi) or [nep.singhd@gmail.com](mailto:nep.singhd@gmail.com))

**Supplementary table (S1):**

**Probability of false-positive (FP) test and true-positive in women before the visit with lump or visit with no history of lump**

| <b>Screen number</b> | <b>FP test probability with no lump</b> | <b>FP test probability before visit with lump</b> | <b>True-positive probability with no lump</b> | <b>True-positive probability before visit with lump</b> |
|----------------------|-----------------------------------------|---------------------------------------------------|-----------------------------------------------|---------------------------------------------------------|
| 1                    | 0.0390                                  | 0.0630                                            | 0.0042                                        | 0.0042                                                  |
| 2                    | 0.0202                                  | 0.0377                                            | 0.0033                                        | 0.0030                                                  |
| 3                    | 0.0177                                  | 0.0300                                            | 0.0039                                        | 0.0046                                                  |
| 4                    | 0.0156                                  | 0.0326                                            | 0.0042                                        | 0.0046                                                  |
| 5                    | 0.0146                                  | 0.0285                                            | 0.0049                                        | 0.0030                                                  |
| 6                    | 0.0142                                  | 0.0223                                            | 0.0056                                        | 0.0063                                                  |
| 7                    | 0.0138                                  | 0.0379                                            | 0.0061                                        | 0.0047                                                  |
| 8                    | 0.0133                                  | 0.0299                                            | 0.0066                                        | 0                                                       |
| 9                    | 0.0164                                  | 0                                                 | 0.0070                                        | 0                                                       |
| 10                   | 0.0220                                  | 0                                                 | 0.0086                                        | 0                                                       |
